# Supplementary material for: Campylobacter epidemiology: a descriptive study reviewing 1 million cases in England and Wales between 1989 and 2011
Source: PubMed Central journal article supplement — BMJ Open. 2012 Jul 12;2(4):e001179. doi: 10.1136/bmjopen-2012-001179 (PMC3400078; doi:10.1136/bmjopen-2012-001179), 2012-07-12
Supplement: bmjopen-2012-001179-s1.pdf [file bmjopen-2012-001179-s1.pdf]

Justification for the drivers in: **Table 2. The main hypothesised drivers for changes in *Campylobacter*.**

Below are the hypothesised contributing factor and their estimated likelihood of causing: 1. Long term change; 2. Seasonal spring increase; 3. Increase in adults over 50 years old; 4. More rural than urban cases; 5. More cases in the more affluent, in *Campylobacter* cases. The scoring as Low, Medium or High is on the basis of published literature and rational examination of the evidence base.

Table 2. The main hypothesised drivers for changes in *Campylobacter*.

| Hypothesised contributing factor                                     | Estimated likelihood of causing: |                          |                                      |                             |                                 |
|----------------------------------------------------------------------|----------------------------------|--------------------------|--------------------------------------|-----------------------------|---------------------------------|
|                                                                      | Long term change                 | Seasonal spring increase | Increase in adults over 50 years old | More rural than urban cases | More cases in the more affluent |
| <b>Surveillance ascertainment</b>                                    |                                  |                          |                                      |                             |                                 |
| Impacts of NHS Direct                                                | Medium                           | Low                      | Low                                  | Low                         | Low                             |
| National reporting                                                   | Medium                           | Low                      | Low                                  | Low                         | Low                             |
| Changes in the surveillance system                                   | Low                              | Low                      | Low                                  | Low                         | Medium                          |
| Changes in <i>Campylobacter</i> culture media                        | Medium                           | Low                      | Low                                  | Low                         | Low                             |
| Laboratory testing policy                                            | Medium                           | Low                      | Low                                  | Low                         | Low                             |
| New laws requiring laboratory notification of <i>Campylobacter</i> * | Low                              | Low                      | Low                                  | Low                         | Low                             |
| <b>Susceptibility</b>                                                |                                  |                          |                                      |                             |                                 |
| Increased proton pump inhibitor use                                  | <b>High</b>                      | Low                      | <b>High</b>                          | Low                         | Low                             |
| Immunity through prior exposure or infection                         | Low                              | Low                      | Low                                  | Low                         | Medium                          |
| <b>Exposure</b>                                                      |                                  |                          |                                      |                             |                                 |
| Increased contamination of chicken                                   | <b>High</b>                      | Medium                   | Low                                  | Low                         | Low                             |
| Increased consumption of chicken                                     | Medium                           | Low                      | Low                                  | Low                         | Medium                          |
| Increased systemic <i>Campylobacter</i> infection in chicken         | <b>High</b>                      | Medium                   | Low                                  | Low                         | Low                             |
| Sourcing chicken from different areas                                | Medium                           | Low                      | Low                                  | Low                         | Medium                          |
| Increase in non-chicken related sources                              | Low                              | Low                      | Low                                  | Medium                      | Low                             |
| Transmission from cattle to chickens by flies                        | Low                              | <b>High</b>              | Low                                  | Low                         | Low                             |
| Transmission from faeces or raw meat to RTE food by flies            | Low                              | <b>High</b>              | Low                                  | <b>High</b>                 | Low                             |
| Biosecurity interventions for <i>Salmonella</i> control              | Medium                           | Low                      | Low                                  | Low                         | Low                             |
| Country walks                                                        | Medium                           | Medium                   | Medium                               | <b>High</b>                 | Medium                          |
| Contamination from agricultural animals                              | Medium                           | Medium                   | Low                                  | <b>High</b>                 | Medium                          |
| Contamination from pets                                              | Low                              | Medium                   | Low                                  | Medium                      | Low                             |
| Contamination from wild birds                                        | Low                              | Medium                   | Low                                  | Low                         | Low                             |
| Food preparation involving raw meats                                 | Medium                           | Low                      | Low                                  | Medium                      | Low                             |
| Educational farm visits                                              | Medium                           | Medium                   | Low                                  | Medium                      | Medium                          |
| Barbecued or grilled meat                                            | Medium                           | <b>High</b>              | Medium                               | Low                         | Low                             |
| Private or untreated water supplies                                  | Low                              | Medium                   | Low                                  | Medium                      | Medium                          |
| Mains drinking water                                                 | Low                              | Low                      | Low                                  | Low                         | Low                             |
| Surface water/ sewage exposure                                       | Medium                           | Medium                   | Low                                  | Medium                      | Low                             |
| <b>Social factors</b>                                                |                                  |                          |                                      |                             |                                 |
| Population aging/demographic change                                  | <b>High</b>                      | Low                      | <b>High</b>                          | Medium                      | Low                             |
| The economic situation                                               | Medium                           | Low                      | Low                                  | Low                         | Medium                          |
| Socioeconomic status                                                 | Medium                           | Low                      | Low                                  | Medium                      | <b>High</b>                     |
| Changes in <i>Campylobacter</i> in other countries                   | Medium                           | Medium                   | Low                                  | Low                         | Low                             |
| Kitchen behaviour                                                    | Low                              | Low                      | Low                                  | Low                         | Low                             |
| GP access                                                            | <b>High</b>                      | Low                      | Low                                  | <b>High</b>                 | <b>High</b>                     |
| Two weekly waste bin collections                                     | Low                              | Low                      | Low                                  | Low                         | Low                             |
| Travel abroad                                                        | Medium                           | Low                      | <b>High</b>                          | Low                         | <b>High</b>                     |
| Eating out                                                           | Medium                           | low                      | Medium                               | Low                         | Medium                          |
| <b>Environmental factors</b>                                         |                                  |                          |                                      |                             |                                 |
| Temperature                                                          | Low                              | Medium                   | Low                                  | Low                         | Low                             |
| Rainfall                                                             | Low                              | Low                      | Low                                  | Low                         | Low                             |
| Latitude/longitude                                                   | Low                              | Medium                   | Low                                  | Medium                      | Low                             |

\*Human disease notification

**The Impact of NHS Direct** has been hypothesized to be to prevent a proportion of cases reaching surveillance as a result of a cohort being dealt with through NHS Direct and never having a laboratory examination. It is argued that this could have an impact on long-term reporting in children, but less so in adults (1). Others have argued that the impact of this is likely to be small (2). Because it is a systematic change in surveillance it would be unlikely to show as a seasonal effect. The steady increase in cases in the elderly suggests this effect has not had a substantial impact on reporting in the elderly. There is no evidence that any differential reduction of reporting should more greatly affect urban than rural or affluent than poor.

|                                         |        |
|-----------------------------------------|--------|
| 1. Long term change                     | Medium |
| 2. Seasonal spring increase             | Low    |
| 3. Increase in adults over 50 years old | Low    |
| 4. More rural than urban cases          | Low    |
| 5. More cases in the more affluent      | Low    |

**National reporting** can be influenced by social factors with the bank holidays representing a particular example of a seasonal change that seems to be related to reduced access to primary healthcare services. Changes in national reporting could also have an impact on the number of annual cases reported as a result of local or national changes in the reporting process (anything from physician policy on faecal sample testing, laboratory policy on tests undertaken and completeness of reporting). These changes would be most obvious in influencing long-term changes in local or national reporting than they would in seasonal, adult, rural, or poor populations.

|                                         |        |
|-----------------------------------------|--------|
| 1. Long term change                     | Medium |
| 2. Seasonal spring increase             | Low    |
| 3. Increase in adults over 50 years old | Low    |
| 4. More rural than urban cases          | Low    |
| 5. More cases in the more affluent      | Low    |

**Changes in the surveillance system** that have occurred over the period of this study have included better data capture through computer reporting, the impacts of the change from PHLS to HPA, the more standardized data collection that began in 2002, changes in GP access including NHS Direct, the conducting of Sentinel Surveillance, CLASSP and case-control studies, which could have increased case numbers temporarily. There seem to be relatively few impacts of changes in surveillance on these five variables, and although the difference between more affluent and less affluent might be influenced by changes in the surveillance system these do not appear to be large if they occur at all.

|                                         |        |
|-----------------------------------------|--------|
| 1. Long term change                     | Low    |
| 2. Seasonal spring increase             | Low    |
| 3. Increase in adults over 50 years old | Low    |
| 4. More rural than urban cases          | Low    |
| 5. More cases in the more affluent      | Medium |

**Changes in *Campylobacter* culture** could influence the long term reporting of *Campylobacter*. The period of time between defecation and culture can influence isolation rate as can the antibiotic additives, the gas mixture and any enrichment used. There is little published information on the impact of these methodological factors on isolation, although the use of membrane methods in South Africa suggests that it is possible to routinely isolate a wider range of species using these methods, presumably because some strains such as *C. consisus* are more sensitive to the selective antibiotics used in *Campylobacter* isolation media. There is no evidence that this has had a significant impact on the five criteria, but if it had it would be most likely with the long term figures as culture methods have improved over time.

|                                         |        |
|-----------------------------------------|--------|
| 1. Long term change                     | Medium |
| 2. Seasonal spring increase             | Low    |
| 3. Increase in adults over 50 years old | Low    |
| 4. More rural than urban cases          | Low    |
| 5. More cases in the more affluent      | Low    |

**Laboratory testing policy** can greatly influence both national reporting and the age distribution of reported cases. The main impact would probably be on the completeness of reporting as measured by cases per year, rather than the other factors. Any changes would be likely to be over a long time period.

|                             |        |
|-----------------------------|--------|
| 1. Long term change         | Medium |
| 2. Seasonal spring increase | Low    |

|                                         |     |
|-----------------------------------------|-----|
| 3. Increase in adults over 50 years old | Low |
| 4. More rural than urban cases          | Low |
| 5. More cases in the more affluent      | Low |

**New laws requiring laboratory notification of *Campylobacter*** might be found to have influenced national reporting as a result of voluntary laboratory reporting systems being made mandatory. At present this does not seem to be the case.

|                                         |     |
|-----------------------------------------|-----|
| 1. Long term change                     | Low |
| 2. Seasonal spring increase             | Low |
| 3. Increase in adults over 50 years old | Low |
| 4. More rural than urban cases          | Low |
| 5. More cases in the more affluent      | Low |

**Increased proton pump inhibitor use** has been postulated as an important factor in *Campylobacter* infection (3-6). Because the use of such drugs has increased over recent years there is a reasonable indication that the impact of there could have had a big effect on the overall numbers of cases of *Campylobacter* reported through surveillance, and because these are drugs frequently taken by older people then the higher incidence of infection in this group may be linked.

|                                         |      |
|-----------------------------------------|------|
| 1. Long term change                     | High |
| 2. Seasonal spring increase             | Low  |
| 3. Increase in adults over 50 years old | High |
| 4. More rural than urban cases          | Low  |
| 5. More cases in the more affluent      | Low  |

**Immunity through prior exposure or infection** is found in a variety of enteric pathogens. With *Campylobacter* the argument is that some groups are more exposed to *Campylobacter* through chicken (7-9) with repeated infection comes a degree of resistance to symptomatic disease if not infection following exposure. The lower incidence of *Campylobacter* infection in people living in areas of low socioeconomic status could reflect lower exposure, poorer access to healthcare or more infection in childhood conferring resistance to infection as an adult. If community exposure to *Campylobacter* over the years has declined then one could expect more cases in the younger population rather than the observed increase in people over 50 years. In some case-control studies the recent consumption of chicken is protective, suggesting exposure is leading to immunity (10).

|                                         |        |
|-----------------------------------------|--------|
| 1. Long term change                     | Low    |
| 2. Seasonal spring increase             | Low    |
| 3. Increase in adults over 50 years old | Low    |
| 4. More rural than urban cases          | Low    |
| 5. More cases in the more affluent      | Medium |

**Increased contamination of chicken** might be an explanation for the increased cases over time. Chicken is commonly contaminated with *Campylobacter* and a significant fraction of human infection is thought to derive from chicken (11-19). There is some evidence that chicken flocks are more contaminated with *Campylobacter* in the summer, although this rise in contamination seems to follow the rise in human disease rather than precede it (20-25). The increase could be in percentage contamination of chicken or the heaviness of contamination. It is not impossible that a mechanism explaining a link between increased contamination of chicken and increases in the elderly or the more affluent might be possible, but is currently thought unlikely. If the seasonal contamination of flocks is caused by flies as has been suggested then this may play a role in both the seasonality of human disease and the increased seasonal contamination of chickens with cattle strains (check references). Cross contamination from chicken to salads and soft fruits (18;26-28) might be seasonal whereas to other ready to eat meals may not be. The types of *Campylobacter* on chicken may also be important in both seasonality and long term changes (29).

|                                         |        |
|-----------------------------------------|--------|
| 1. Long term change                     | High   |
| 2. Seasonal spring increase             | Medium |
| 3. Increase in adults over 50 years old | Low    |
| 4. More rural than urban cases          | Low    |
| 5. More cases in the more affluent      | Low    |

**Increased consumption of chicken** could potentially be an explanation for a long term increase in human *Campylobacter* infection. However, there does not seem to be clear evidence that chicken consumption in England and Wales has had an

impact on the occurrence of human disease. The seasonality of *Campylobacter* is unlikely to be greatly affected by the seasonality of chicken consumption, although cross contamination of salad items might be expected to be more seasonal. As chicken is the commonest risk factor for *Campylobacter* infection, and it is a cheap food, then differences in socioeconomic status could affect chicken consumption and have an impact on infection, although there is no published evidence for this.

|                                         |        |
|-----------------------------------------|--------|
| 1. Long term change                     | Medium |
| 2. Seasonal spring increase             | Low    |
| 3. Increase in adults over 50 years old | Low    |
| 4. More rural than urban cases          | Low    |
| 5. More cases in the more affluent      | Medium |

**Increased systemic *Campylobacter* infection in chicken** might expose people to infection more commonly if there are foci of infection in muscle and liver for example. The recent rise in outbreaks of *Campylobacter* infection are as a result of undercooking chicken livers. The contamination could be internal or external, but an explanation involving an increase in systemic or hepatic infection causing more livers to be internally contaminated might explain the long term increase in cases in general and the outbreaks in particular.

|                                         |        |
|-----------------------------------------|--------|
| 1. Long term change                     | High   |
| 2. Seasonal spring increase             | Medium |
| 3. Increase in adults over 50 years old | Low    |
| 4. More rural than urban cases          | Low    |
| 5. More cases in the more affluent      | Low    |

**Sourcing chicken from different areas** might be a possible reason for an increase in *Campylobacter* in the longer term. This could be differences between *Campylobacter* contamination of chickens from different UK producers, but could also be those in other EU states and countries outside of the EU. There is little supporting evidence in this area.

|                                         |        |
|-----------------------------------------|--------|
| 1. Long term change                     | Medium |
| 2. Seasonal spring increase             | Low    |
| 3. Increase in adults over 50 years old | Low    |
| 4. More rural than urban cases          | Low    |
| 5. More cases in the more affluent      | Medium |

**Increase in non-chicken related sources** remains a possibility for the long term increase in human *Campylobacter* infections. This is an area that may be resolved by source attribution. As non-chicken sources are more common in rural areas it will be interesting to see if the chicken related strains increase or decrease over time with interventions in chicken production. This has been observed in New Zealand following interventions to reduce chicken contamination (30-32).

|                                         |        |
|-----------------------------------------|--------|
| 1. Long term change                     | Low    |
| 2. Seasonal spring increase             | Low    |
| 3. Increase in adults over 50 years old | Low    |
| 4. More rural than urban cases          | Medium |
| 5. More cases in the more affluent      | Low    |

**Transmission from cattle to chickens by flies** remains an important component of the biosecurity aspects of the control of *Campylobacter* in chicken flocks (33;34). As flies are seasonal and their numbers and activity have been hypothesized to coincide with the rise in flock contamination with *Campylobacter* and with human disease (35;36). Transmission from cattle to chicken flocks is more likely to occur in a rural setting, but chicken production is also likely to be rural so this may not have an impact on human disease.

|                                         |      |
|-----------------------------------------|------|
| 1. Long term change                     | Low  |
| 2. Seasonal spring increase             | High |
| 3. Increase in adults over 50 years old | Low  |
| 4. More rural than urban cases          | Low  |
| 5. More cases in the more affluent      | Low  |

**Transmission from faeces or raw meat to RTE food by flies** has been hypothesized as a transmission route that bypasses most of the HACCP food chain protection by the direct transmission of faecal contamination to ready to eat foods (35;36). This could

be expected to have a seasonal impact, and to be more marked in rural than urban areas. One could postulate that the poor might have greater exposure to flies than the rich but there is little evidence that this is the case in the UK. It is assumed that fly populations can change from year to year but are not the main driver for long term changes, or for the increase in adults.

|                                         |      |
|-----------------------------------------|------|
| 1. Long term change                     | Low  |
| 2. Seasonal spring increase             | High |
| 3. Increase in adults over 50 years old | Low  |
| 4. More rural than urban cases          | High |
| 5. More cases in the more affluent      | Low  |

**Biosecurity interventions for *Salmonella* control** are an important part of the reductions in infection that have contributed to fewer *S. Enteritidis* infections over recent years (37). If these interventions work for *Salmonella* then it is reasoned that they could also have some impact on *Campylobacter* contamination of chicken flocks. It is possible that the reductions in *Campylobacter* during the early 2000's were associated with increased biosecurity and that the subsequent rise in cases has been as a result of less vigilant subsequent biosecurity because the vaccination is maintaining low *Salmonella* contamination rates in flocks.

|                                         |        |
|-----------------------------------------|--------|
| 1. Long term change                     | Medium |
| 2. Seasonal spring increase             | Low    |
| 3. Increase in adults over 50 years old | Low    |
| 4. More rural than urban cases          | Low    |
| 5. More cases in the more affluent      | Low    |

**Country walks** have been hypothesized as a source of exposure to *Campylobacter* becausee contamination of the environment is high. Although the sources of contamination are complicated, the country walk may be only one of a number of transmission routes (38). An increase in country walks could contribute to long term change, particularly in the elderly and more affluent. Walking could also contribute to seasonal changes in infection and is by it's nature more common in rural areas. However, evidence supporting this is not robust and the attributable fraction of people deriving their infections from country walks is probably low.

|                                         |        |
|-----------------------------------------|--------|
| 1. Long term change                     | Medium |
| 2. Seasonal spring increase             | Medium |
| 3. Increase in adults over 50 years old | Medium |
| 4. More rural than urban cases          | High   |
| 5. More cases in the more affluent      | Medium |

**Contamination from agricultural animals** is a likely source for some *Campylobacter* infections because they are such a source of contamination within the agricultural environment (39). Large changes, such as the impacts of the 2001 foot and mouth outbreak, could have contributed to long term changes, and putting agricultural animals out to pasture in the spring may also contribute to direct or indirect exposure of people to *Campylobacter*.

|                                         |        |
|-----------------------------------------|--------|
| 1. Long term change                     | Medium |
| 2. Seasonal spring increase             | Medium |
| 3. Increase in adults over 50 years old | Low    |
| 4. More rural than urban cases          | High   |
| 5. More cases in the more affluent      | Low    |

**Contamination from pets** has long been argued as a source of *Campylobacter* infection (40-45), although the attributable fraction might be small. It is unlikely to have changed substantially over recent years, but supporting evidence for this is not available. It would be reasonable to assume that pets in the country might be more exposed to animal sources of *Campylobacter* contamination than those in urban areas, although the evidence for this is limited.

|                                         |        |
|-----------------------------------------|--------|
| 1. Long term change                     | Low    |
| 2. Seasonal spring increase             | Medium |
| 3. Increase in adults over 50 years old | Low    |
| 4. More rural than urban cases          | Medium |
| 5. More cases in the more affluent      | Low    |

**Contamination from wild birds** is a recognized potential source of human infection (46-49). Because many birds are migratory it is possible that human exposure to their faeces will change through the year and be a driver for disease (50;51). The burden of disease attributed to bird sources seems however to be low. The commonest likely exposure route would be direct contact with contaminated bird faeces in the garden, contamination of field grown fruit and vegetables and contamination of source waters for irrigation. Bird-pecked milk in bottles can cause *Campylobacter* infection (52;52;53) and the source is probably cow faeces. Bird pecked milk related infections appear to be seasonal in distribution with a marked increase in May (54).

|                                         |        |
|-----------------------------------------|--------|
| 1. Long term change                     | Low    |
| 2. Seasonal spring increase             | Medium |
| 3. Increase in adults over 50 years old | Low    |
| 4. More rural than urban cases          | Low    |
| 5. More cases in the more affluent      | Low    |

**Food preparation involving raw meats** can change over time and could have an impact on human *Campylobacter* infections. Preparing raw meats is an important risk factor for human disease and social and economic changes that influence meat preparation could affect disease. For example in a period of economic decline, such as we have experienced over the last four years, people may eat out less and prepare meals at home more. People in the countryside may have a different exposure to raw meats than those in urban areas.

|                                         |        |
|-----------------------------------------|--------|
| 1. Long term change                     | Medium |
| 2. Seasonal spring increase             | Low    |
| 3. Increase in adults over 50 years old | Low    |
| 4. More rural than urban cases          | Medium |
| 5. More cases in the more affluent      | Low    |

**Educational farm visits** can be a source of outbreaks with a variety of gastrointestinal infections. *Campylobacter* strains from cattle have been linked to strains from human infections (55;56). Cattle and sheep represent a significant reservoir of *Campylobacter* (57;58), and the occurrence of milk-borne outbreaks (13;59-65) suggests that other routes may occur. There is evidence that faecal shedding by sheep is more frequent around lambing (66). The perceived increase in attendances at farms over recent years could contribute to long term changes, is likely to be seasonal, may be more frequent in the more affluent and more likely in rural areas. However, outbreaks of *Campylobacter* linked to farm visits are infrequent compared to *Cryptosporidium* and VTEC so the attributable fraction of cases related to farm visits may be small. An outbreak of *Campylobacter* in workers on a Pheasant farm shows that farm workers can acquire infections directly (67).

|                                         |        |
|-----------------------------------------|--------|
| 1. Long term change                     | Medium |
| 2. Seasonal spring increase             | Medium |
| 3. Increase in adults over 50 years old | Low    |
| 4. More rural than urban cases          | Medium |
| 5. More cases in the more affluent      | Medium |

**Barbecued or grilled meat** represent a source of exposure to *Campylobacter* that is known to be seasonal (3;68-75). If barbecuing is increasing then this could influence a long term increase in cases as well as the increase in older people, although there is no evidence for this. There is no evidence that barbecues are more of a risk to urban than rural or affluent than poor people.

|                                         |        |
|-----------------------------------------|--------|
| 1. Long term change                     | Medium |
| 2. Seasonal spring increase             | High   |
| 3. Increase in adults over 50 years old | Medium |
| 4. More rural than urban cases          | Low    |
| 5. More cases in the more affluent      | Low    |

**Private or untreated water supplies** can result in outbreaks of *Campylobacter* which is the commonest pathogen causing such outbreaks (76;77). Outbreaks linked to private water supplies may show some seasonality, and will be more common in rural than urban areas. There could be differences in wealth between people on private water supplies but it seems unlikely that this could explain the excess of cases in the affluent, the increase in adults over 50 years old or the long term trend.

|                                         |        |
|-----------------------------------------|--------|
| 1. Long term change                     | Low    |
| 2. Seasonal spring increase             | Medium |
| 3. Increase in adults over 50 years old | Low    |

|                                    |        |
|------------------------------------|--------|
| 4. More rural than urban cases     | Medium |
| 5. More cases in the more affluent | Medium |

**Mains drinking water** has been involved in outbreaks of *Campylobacter* (78-88), and these are more common in countries where chlorination is not universal (89) or where chlorination has failed (90). There is no evidence that *Campylobacter* transmission through drinking water is common in England and Wales or is likely to have had a significant impact on the five parameters.

|                                         |     |
|-----------------------------------------|-----|
| 1. Long term change                     | Low |
| 2. Seasonal spring increase             | Low |
| 3. Increase in adults over 50 years old | Low |
| 4. More rural than urban cases          | Low |
| 5. More cases in the more affluent      | Low |

**Surface water/sewage exposure** through contamination of recreational water (91-94), including inland and coastal bathing and water-sports may be seasonal. Exposure can be influenced by changes in water quality or behavior, and may change over years. Exposure is more likely in rural areas but is unlikely to be greatly influenced by affluence.

|                                         |        |
|-----------------------------------------|--------|
| 1. Long term change                     | Medium |
| 2. Seasonal spring increase             | Medium |
| 3. Increase in adults over 50 years old | Low    |
| 4. More rural than urban cases          | Medium |
| 5. More cases in the more affluent      | Low    |

**Population aging/demographic change** is a good candidate for explaining the long term change in *Campylobacter* cases, and may similarly partly explain the increase in cases in the elderly. It is possible that movement of older people out of urban areas could be an explanation for some of the excess of cases in rural areas. However, the population effects are unlikely to have an impact on seasonality, although the age structure might (95).

|                                         |        |
|-----------------------------------------|--------|
| 1. Long term change                     | High   |
| 2. Seasonal spring increase             | Low    |
| 3. Increase in adults over 50 years old | High   |
| 4. More rural than urban cases          | Medium |
| 5. More cases in the more affluent      | Low    |

**The economic situation** has changed people's behavior and this may contribute to long term changes in *Campylobacter* infection. Measurements of these behavioral changes (e.g. change in eating arrangements) might contribute to long term changes in infection rates and could alter the rates between affluent and poor.

|                                         |        |
|-----------------------------------------|--------|
| 1. Long term change                     | Medium |
| 2. Seasonal spring increase             | Low    |
| 3. Increase in adults over 50 years old | Low    |
| 4. More rural than urban cases          | Low    |
| 5. More cases in the more affluent      | Medium |

**Socioeconomic status** itself may explain the excess of cases in people living in more affluent areas, although ethnic origin, exposure to different foods (96) and other factors may contribute to this.

|                                         |        |
|-----------------------------------------|--------|
| 1. Long term change                     | Medium |
| 2. Seasonal spring increase             | Low    |
| 3. Increase in adults over 50 years old | Low    |
| 4. More rural than urban cases          | Medium |
| 5. More cases in the more affluent      | High   |

**Changes in *Campylobacter* in other countries** that resemble those seen in England and Wales are assumed to show some more fundamental relationship that affects all countries. For example the seasonality (more cases in summer months) can be seen in most European countries but the rise and fall in cases has a different timing in different countries, suggesting an indirect relationship to weather (97). Similarly changes in the long term rates of infection that move in a similar way across different countries might be assumed to reflect common drivers or mechanisms across these countries.

|                                         |        |
|-----------------------------------------|--------|
| 1. Long term change                     | Medium |
| 2. Seasonal spring increase             | Medium |
| 3. Increase in adults over 50 years old | Low    |
| 4. More rural than urban cases          | Low    |
| 5. More cases in the more affluent      | Low    |

**Kitchen behaviour** might be assumed to be common across most adults, over longer term periods, over different seasonal, in rural and urban areas and across the social spectrum. Whether this is the case is unclear, but there is little evidence that these factors influence the changes in disease over the five criteria.

|                                         |     |
|-----------------------------------------|-----|
| 1. Long term change                     | Low |
| 2. Seasonal spring increase             | Low |
| 3. Increase in adults over 50 years old | Low |
| 4. More rural than urban cases          | Low |
| 5. More cases in the more affluent      | Low |

**GP access** is likely to be poorer in some social groups than others, and is probably variable geographically. This is unlikely to be an explanation for seasonality or the increase in people over 50 years, but could contribute to differences in urban/rural and socioeconomic status but may also have contributed to some of the changes over the longer term.

|                                         |      |
|-----------------------------------------|------|
| 1. Long term change                     | High |
| 2. Seasonal spring increase             | Low  |
| 3. Increase in adults over 50 years old | Low  |
| 4. More rural than urban cases          | High |
| 5. More cases in the more affluent      | High |

**Two weekly waste bin collections** have been considered as potentially increasing the risks of food-borne diseases to people locally because food waste may decompose and flies may arise. Because there has been a recent trend to collecting household waste on a two weekly rather than weekly basis along with recycling parts of the rubbish it is plausible that there could have been a change in *Campylobacter* associated with this. However, there is no evidence for this having any effect on *Campylobacter* infections.

|                                         |     |
|-----------------------------------------|-----|
| 1. Long term change                     | Low |
| 2. Seasonal spring increase             | Low |
| 3. Increase in adults over 50 years old | Low |
| 4. More rural than urban cases          | Low |
| 5. More cases in the more affluent      | Low |

**Travel abroad** is an important risk factor for many enteric infections (98;99) and for *Campylobacter* (100-102), including military service (100;103) and probably represents a significant percentage of all cases of travellers diarrhoea (104-107). In some countries more than 50% of *Campylobacter* cases may be linked to foreign travel (108). In England and Wales about a fifth of *Campylobacter* cases are thought to follow travel abroad. The seasonality of infections can be specific for individual countries (109). Travel is more common in the more affluent and is increasingly common in the elderly, possibly contributing to the rise in cases in this group. Although travel is seasonal and contributes to the overall seasonality of *Campylobacter* it does not explain the late spring increase. Travel is probably not a significant cause of the differences seen between urban and rural populations.

|                                         |        |
|-----------------------------------------|--------|
| 1. Long term change                     | Medium |
| 2. Seasonal spring increase             | Low    |
| 3. Increase in adults over 50 years old | High   |
| 4. More rural than urban cases          | Low    |
| 5. More cases in the more affluent      | High   |

**Eating out** is an activity that can change our exposure to *Campylobacter*, either for the better or worse. Changes in the extent to which people eat out could contribute to longer term changes in exposure to *Campylobacter* and might be influenced by socioeconomic status and age.

|                             |        |
|-----------------------------|--------|
| 1. Long term change         | Medium |
| 2. Seasonal spring increase | Low    |



|                                         |        |
|-----------------------------------------|--------|
| 3. Increase in adults over 50 years old | Medium |
| 4. More rural than urban cases          | Low    |
| 5. More cases in the more affluent      | Medium |

**Temperature** is known to have some association with *Campylobacter* and this is thought to be indirect (95;97). While it might explain some of the seasonality it is unlikely to be the only factor causing it. Temperature appears to have little explanatory value on relation to the other key factors.

|                                         |        |
|-----------------------------------------|--------|
| 1. Long term change                     | Low    |
| 2. Seasonal spring increase             | Medium |
| 3. Increase in adults over 50 years old | Low    |
| 4. More rural than urban cases          | Low    |
| 5. More cases in the more affluent      | Low    |

**Rainfall** does not correlate well with *Campylobacter*, but could be involved in outbreaks linked to private water supplies. It does not appear to have a significant impact on any of the factors.

|                                         |     |
|-----------------------------------------|-----|
| 1. Long term change                     | Low |
| 2. Seasonal spring increase             | Low |
| 3. Increase in adults over 50 years old | Low |
| 4. More rural than urban cases          | Low |
| 5. More cases in the more affluent      | Low |

**Latitude/longitude** show some effect in relation to the spring rise in *Campylobacter* cases which increase earlier in more Western and Northern areas, and part of this may be down to more rural populations living in these areas.

|                                         |        |
|-----------------------------------------|--------|
| 1. Long term change                     | Low    |
| 2. Seasonal spring increase             | Medium |
| 3. Increase in adults over 50 years old | Low    |
| 4. More rural than urban cases          | Medium |
| 5. More cases in the more affluent      | Low    |

#### **Interpretation of what the paper shows**

Based on the inferences drawn up in Table 2 the biggest influences on long term change appear to be chicken contamination, proton pump inhibitor use, demographics and access to a GP. For seasonal changes the flies and barbecued food seem to be the most likely drivers. For the long term increase in the percentage of *Campylobacter* cases in people 50 years, proton pump inhibitor use, demographics and travel seem to be the most important factors driving the change. In explaining the differences between urban and rural cases possible important factors are flies, walking in the countryside, contact with animals and GP access, although the generally older population in less urban areas may also contribute. The difference in rates of infection between deprived and non-deprived groups seems to relate to socioeconomic status and income, to access to health services and probably also to greater exposure to *Campylobacter* through travel.

Chicken remains an important source of infection, although the change in case numbers in this report does not seem to correlate to chicken consumption.

#### Reference List

- (1) Gillespie IA, O'Brien SJ, Bolton FJ. Age patterns of persons with campylobacteriosis, England and Wales, 1990-2007. *Emerg Infect Dis* 2009 Dec;15(12):2046-8.
- (2) Tam CC, Rodrigues LC, Viviani L, Dodds JP, Evans MR, Hunter PR, et al. Longitudinal study of infectious intestinal disease in the UK (IID2 study): incidence in the community and presenting to general practice. *Gut* 2011 Jun 27.
- (3) Doorduyn Y, Van Den Brandhof WE, Van Duynhoven YT, Breukink BJ, Wagenaar JA, VAN PW. Risk factors for indigenous *Campylobacter jejuni* and *Campylobacter coli* infections in The Netherlands: a case-control study. *Epidemiol Infect* 2010 Oct;138(10):1391-404.
- (4) Tam CC, Higgins CD, Neal KR, Rodrigues LC, Millership SE, O'Brien SJ. Chicken consumption and use of acid-suppressing medications as risk factors for *Campylobacter enteritis*, England. *Emerg Infect Dis* 2009 Sep;15(9):1402-8.
- (5) Doorduyn Y, VAN PW, Siezen CL, Van Der Horst F, Van Duynhoven YT, Hoebee B, et al. Novel insight in the association between salmonellosis or campylobacteriosis and chronic illness, and the role of host genetics in susceptibility to these diseases. *Epidemiol Infect* 2008 Sep;136(9):1225-34.
- (6) Neal KR, Slack RC. Diabetes mellitus, anti-secretory drugs and other risk factors for campylobacter gastro-enteritis in adults: a case-control study. *Epidemiol Infect* 1997 Dec;119(3):307-11.
- (7) Wilson IG. Airborne *Campylobacter* infection in a poultry worker: case report and review of the literature. *Commun Dis Public Health* 2004 Dec;7(4):349-53.
- (8) Price LB, Roess A, Graham JP, Baqar S, Vailes R, Sheikh KA, et al. Neurologic symptoms and neuropathologic antibodies in poultry workers exposed to *Campylobacter jejuni*. *J Occup Environ Med* 2007 Jul;49(7):748-55.
- (9) Potter RC, Kaneene JB, Gardiner J. A comparison of *Campylobacter jejuni* enteritis incidence rates in high- and low-poultry-density counties: Michigan 1992-1999. *Vector Borne Zoonotic Dis* 2002;2(3):137-43.
- (10) Eberhart-Phillips J, Walker N, Garrett N, Bell D, Sinclair D, Rainger W, et al. *Campylobacteriosis* in New Zealand: results of a case-control study. *J Epidemiol Community Health* 1997 Dec;51(6):686-91.
- (11) Pearson AD, Greenwood MH, Donaldson J, Healing TD, Jones DM, Shahamat M, et al. Continuous source outbreak of campylobacteriosis traced to chicken. *J Food Prot* 2000 Mar;63(3):309-14.
- (12) Evans MR, Lane W, Frost JA, Nysten G. A campylobacter outbreak associated with stir-fried food. *Epidemiol Infect* 1998 Oct;121(2):275-9.
- (13) Pebody RG, Ryan MJ, Wall PG. Outbreaks of campylobacter infection: rare events for a common pathogen. *Commun Dis Rep CDR Rev* 1997 Mar 7;7(3):R33-R37.
- (14) Murphy O, Gray J, Gordon S, Bint AJ. An outbreak of campylobacter food poisoning in a health care setting. *J Hosp Infect* 1995 Jul;30(3):225-8.
- (15) Allerberger F, Al Jazrawi N, Kreidl P, Dierich MP, Feierl G, Hein I, et al. Barbecued Chicken Causing a Multi-State Outbreak of *Campylobacter jejuni* Enteritis. *Infect* 2003 Jan;31(1):19-23.
- (16) Kessel AS, Gillespie IA, O'Brien SJ, Adak GK, Humphrey TJ, Ward LR. General outbreaks of infectious intestinal disease linked with poultry, England and Wales, 1992-1999. *Commun Dis Public Health* 2001 Sep;4(3):171-7.
- (17) Rodrigues LC, Cowden JM, Wheeler JG, Sethi D, Wall PG, Cumberland P, et al. The study of infectious intestinal disease in England: risk factors for cases of infectious intestinal disease with *Campylobacter jejuni* infection. *Epidemiol Infect* 2001 Oct;127(2):185-93.
- (18) Anon. Outbreak of *Campylobacter enteritis* associated with cross-contamination of food--Oklahoma, 1996. *MMWR Morb Mortal Wkly Rep* 1998 Feb 27;47(7):129-31.
- (19) Layton MC, Calliste SG, Gomez TM, Patton C, Brooks S. A mixed foodborne outbreak with *Salmonella heidelberg* and *Campylobacter jejuni* in a nursing home. *Infect Control Hosp Epidemiol* 1997 Feb;18(2):115-21.
- (20) Wilson IG. *Salmonella* and campylobacter contamination of raw retail chickens from different producers: a six year survey. *Epidemiol Infect* 2002 Dec;129(3):635-45.

- (21) Hanninen ML, Perko-Makela P, Pitkala A, Rautelin H. A three-year study of *Campylobacter jejuni* genotypes in humans with domestically acquired infections and in chicken samples from the Helsinki area. *J Clin Microbiol* 2000 May;38(5):1998-2000.
- (22) Hudson JA, Nicol C, Wright J, Whyte R, Hasell SK. Seasonal variation of *Campylobacter* types from human cases, veterinary cases, raw chicken, milk and water. *J Appl Microbiol* 1999 Jul;87(1):115-24.
- (23) Wallace JS, Stanley KN, Currie JE, Diggle PJ, Jones K. Seasonality of thermophilic *Campylobacter* populations in chickens. *J Appl Microbiol* 1997 Feb;82(2):219-24.
- (24) Humphrey TJ, Henley A, Lanning DG. The colonization of broiler chickens with *Campylobacter jejuni*: some epidemiological investigations. *Epidemiol Infect* 1993 Jun;110(3):601-7.
- (25) Kapperud G, Skjerve E, Vik L, Hauge K, Lysaker A, Aalmen I, et al. Epidemiological investigation of risk factors for *Campylobacter* colonization in Norwegian broiler flocks. *Epidemiol Infect* 1993 Oct;111(2):245-55.
- (26) Ronveaux O, Quoilin S, Van Loock F, Lheureux P, Struelens M, Butzler JP. A *Campylobacter coli* foodborne outbreak in Belgium. *Acta Clin Belg* 2000 Nov;55(6):307-11.
- (27) Roels TH, Wickus B, Bostrom HH, Kazmierczak JJ, Nicholson MA, Kurzynski TA, et al. A foodborne outbreak of *Campylobacter jejuni* (O:33) infection associated with tuna salad: a rare strain in an unusual vehicle. *Epidemiol Infect* 1998 Oct;121(2):281-7.
- (28) Kirk M, Waddell R, Dalton C, Creaser A, Rose N. A prolonged outbreak of *Campylobacter* infection at a training facility. *Commun Dis Intell* 1997 Mar 6;21(5):57-61.
- (29) Gormley FJ, MacRae M, Forbes KJ, Ogden ID, Dallas JF, Strachan NJ. Has retail chicken played a role in the decline of human *Campylobacteriosis*? *Appl Environ Microbiol* 2008 Jan;74(2):383-90.
- (30) Muellner P, Marshall JC, Spencer SE, Noble AD, Shadbolt T, Collins-Emerson JM, et al. Utilizing a combination of molecular and spatial tools to assess the effect of a public health intervention. *Prev Vet Med* 2011 Dec 1;102(3):242-53.
- (31) Sears A, Baker MG, Wilson N, Marshall J, Muellner P, Campbell DM, et al. Marked *Campylobacteriosis* decline after interventions aimed at poultry, New Zealand. *Emerg Infect Dis* 2011 Jun;17(6):1007-15.
- (32) Mullner P, Collins-Emerson JM, Midwinter AC, Carter P, Spencer SE, van der Logt P, et al. Molecular epidemiology of *Campylobacter jejuni* in a geographically isolated country with a uniquely structured poultry industry. *Appl Environ Microbiol* 2010 Apr;76(7):2145-54.
- (33) Hald B, Skovgard H, Pedersen K, Bunkenborg H. Influxed insects as vectors for *Campylobacter jejuni* and *Campylobacter coli* in Danish broiler houses. *Poult Sci* 2008 Jul;87(7):1428-34.
- (34) Hald B, Sommer HM, Skovgard H. Use of fly screens to reduce *Campylobacter* spp. introduction in broiler houses. *Emerg Infect Dis* 2007 Dec;13(12):1951-3.
- (35) Ekdahl K, Normann B, Andersson Y. Could flies explain the elusive epidemiology of *Campylobacteriosis*? *BMC Infect Dis* 2005;5(1):11.
- (36) Nichols GL. Fly transmission of *Campylobacter*. *Emerg Infect Dis* 2005 Mar;11(3):361-4.
- (37) Nichols G. Mapping out the causes of infectious diseases: a case study on the multiple factors involved in *Salmonella* Enteritidis infections. In: Ayres JG, Harrison RM, Nichols G, Maynard RL, editors. *Environmental Medicine*. London: Hodder; 2010. p. 102-5.
- (38) Ethelberg S, Simonsen J, Gerner-Smidt P, Olsen KE, Molbak K. Spatial distribution and registry-based case-control analysis of *Campylobacter* infections in Denmark, 1991-2001. *Am J Epidemiol* 2005 Nov 15;162(10):1008-15.
- (39) Stanley K, Jones K. Cattle and sheep farms as reservoirs of *Campylobacter*. *J Appl Microbiol* 2003;94 Suppl:104S-13S.
- (40) Parsons BN, Williams NJ, Pinchbeck GL, Christley RM, Hart CA, Gaskell RM, et al. Prevalence and shedding patterns of *Campylobacter* spp. in longitudinal studies of kennelled dogs. *Vet J* 2010 Nov 18.
- (41) Salihi MD, Magaji AA, Abdulkadir JU, Kolawale A. Survey of thermophilic *Campylobacter* species in cats and dogs in north-western Nigeria. *Vet Ital* 2010 Oct;46(4):425-30.

- (42) Acke E, McGill K, Golden O, Jones BR, Fanning S, Whyte P. Prevalence of thermophilic *Campylobacter* species in household cats and dogs in Ireland. *Vet Rec* 2009 Jan 10;164(2):44-7.
- (43) Koene MG, Houwers DJ, Dijkstra JR, Duim B, Wagenaar JA. Strain variation within *Campylobacter* species in fecal samples from dogs and cats. *Vet Microbiol* 2009 Jan 1;133(1-2):199-205.
- (44) Parsons BN, Cody AJ, Porter CJ, Stavisky JH, Smith JL, Williams NJ, et al. Typing of *Campylobacter jejuni* isolates from dogs by use of multilocus sequence typing and pulsed-field gel electrophoresis. *J Clin Microbiol* 2009 Nov;47(11):3466-71.
- (45) Acke E, Whyte P, Jones BR, McGill K, Collins JD, Fanning S. Prevalence of thermophilic *Campylobacter* species in cats and dogs in two animal shelters in Ireland. *Vet Rec* 2006 Jan 14;158(2):51-4.
- (46) Waldenstrom J, Axelsson-Olsson D, Olsen B, Hasselquist D, Griekspoor P, Jansson L, et al. *Campylobacter jejuni* colonization in wild birds: results from an infection experiment. *PLoS One* 2010;5(2):e9082.
- (47) Hughes LA, Bennett M, Coffey P, Elliott J, Jones TR, Jones RC, et al. Molecular epidemiology and characterization of *Campylobacter* spp. isolated from wild bird populations in northern England. *Appl Environ Microbiol* 2009 May;75(10):3007-15.
- (48) Waldenstrom J, On SL, Ottvall R, Hasselquist D, Olsen B. Species diversity of campylobacteria in a wild bird community in Sweden. *J Appl Microbiol* 2007 Feb;102(2):424-32.
- (49) Broman T, Waldenstrom J, Dahlgren D, Carlsson I, Eliasson I, Olsen B. Diversities and similarities in PFGE profiles of *Campylobacter jejuni* isolated from migrating birds and humans. *J Appl Microbiol* 2004;96(4):834-43.
- (50) Waldenstrom J, Broman T, Carlsson I, Hasselquist D, Achterberg RP, Wagenaar JA, et al. Prevalence of *Campylobacter jejuni*, *Campylobacter lari*, and *Campylobacter coli* in different ecological guilds and taxa of migrating birds. *Appl Environ Microbiol* 2002 Dec;68(12):5911-7.
- (51) Broman T, Palmgren H, Bergstrom S, Sellin M, Waldenstrom J, Danielsson-Tham ML, et al. *Campylobacter jejuni* in black-headed gulls (*Larus ridibundus*): prevalence, genotypes, and influence on *C. jejuni* epidemiology. *J Clin Microbiol* 2002 Dec;40(12):4594-602.
- (52) Riordan T, Humphrey TJ, Fowles A. A point source outbreak of campylobacter infection related to bird-pecked milk. *Epidemiol Infect* 1993 Apr;110(2):261-5.
- (53) Stuart J, Sufi F, McNulty C, Park P. Outbreak of campylobacter enteritis in a residential school associated with bird pecked bottle tops. *Commun Dis Rep CDR Rev* 1997 Mar 7;7(3):R38-R40.
- (54) Sopwith W, Ashton M, Frost JA, Tocque K, O'Brien S, Regan M, et al. Enhanced surveillance of campylobacter infection in the north west of England 1997-1999. *J Infect* 2003 Jan;46(1):35-45.
- (55) Schouls LM, Reulen S, Duim B, Wagenaar JA, Willems RJ, Dingle KE, et al. Comparative genotyping of *Campylobacter jejuni* by amplified fragment length polymorphism, multilocus sequence typing, and short repeat sequencing: strain diversity, host range, and recombination. *J Clin Microbiol* 2003 Jan;41(1):15-26.
- (56) Nielsen EM, Engberg J, Fussing V, Petersen L, Brogren CH, On SL. Evaluation of phenotypic and genotypic methods for subtyping *Campylobacter jejuni* isolates from humans, poultry, and cattle. *J Clin Microbiol* 2000 Oct;38(10):3800-10.
- (57) Savill M, Hudson A, Devane M, Garrett N, Gilpin B, Ball A. Elucidation of potential transmission routes of *Campylobacter* in New Zealand. *Water Sci Technol* 2003;47(3):33-8.
- (58) Stanley K, Jones K. Cattle and sheep farms as reservoirs of *Campylobacter*. *J Appl Microbiol* 2003;94 Suppl 1:104-13.
- (59) Lehner A, Schneck C, Feierl G, Pless P, Deutz A, Brandl E, et al. Epidemiologic application of pulsed-field gel electrophoresis to an outbreak of *Campylobacter jejuni* in an Austrian youth centre. *Epidemiol Infect* 2000 Aug;125(1):13-6.
- (60) Djuretic T, Wall PG, Nichols G. General outbreaks of infectious intestinal disease associated with milk and dairy products in England and Wales: 1992 to 1996. *Commun Dis Rep CDR Rev* 1997 Mar 7;7(3):R41-R45.
- (61) Evans MR, Roberts RJ, Ribeiro CD, Gardner D, Kembrey D. A milk-borne campylobacter outbreak following an educational farm visit. *Epidemiol Infect* 1996 Dec;117(3):457-62.

- (62) Wood RC, MacDonald KL, Osterholm MT. Campylobacter enteritis outbreaks associated with drinking raw milk during youth activities. A 10-year review of outbreaks in the United States. *JAMA* 1992 Dec 9;268(22):3228-30.
- (63) Kalman M, Szollosi E, Czermann B, Zimanyi M, Szekeres S, Kalman M. Milkborne campylobacter infection in Hungary. *J Food Prot* 2000 Oct;63(10):1426-9.
- (64) Anon. Cryptosporidiosis in England and Wales: prevalence and clinical and epidemiological features. Public Health Laboratory Service Study Group. *BMJ* 1990 Mar 24;300(6727):774-7.
- (65) Morgan D, Gunneberg C, Gunnell D, Healing TD, Lamerton S, Soltanpoor N, et al. An outbreak of Campylobacter infection associated with the consumption of unpasteurised milk at a large festival in England. *Eur J Epidemiol* 1994 Oct;10(5):581-5.
- (66) Jones K, Howard S, Wallace JS. Intermittent shedding of thermophilic campylobacters by sheep at pasture. *J Appl Microbiol* 1999 Mar;86(3):531-6.
- (67) Heryford AG, Seys SA. Outbreak of occupational campylobacteriosis associated with a pheasant farm. *J Agric Saf Health* 2004 May;10(2):127-32.
- (68) Allerberger F, Al-Jazrawi N, Kreidl P, Dierich MP, Feierl G, Hein I, et al. Barbecued chicken causing a multi-state outbreak of Campylobacter jejuni enteritis. *Infection* 2003 Jan;31(1):19-23.
- (69) Kapperud G, Espeland G, Wahl E, Walde A, Herikstad H, Gustavsen S, et al. Factors associated with increased and decreased risk of Campylobacter infection: a prospective case-control study in Norway. *Am J Epidemiol* 2003 Aug 1;158(3):234-42.
- (70) Neimann J, Engberg J, Molbak K, Wegener HC. A case-control study of risk factors for sporadic campylobacter infections in Denmark. *Epidemiol Infect* 2003 Jun;130(3):353-66.
- (71) Ikram R, Chambers S, Mitchell P, Brieseman MA, Ikam OH. A case control study to determine risk factors for campylobacter infection in Christchurch in the summer of 1992-3. *N Z Med J* 1994 Oct 26;107(988):430-2.
- (72) Kapperud G, Skjerve E, Bean NH, Ostroff SM, Lassen J. Risk factors for sporadic Campylobacter infections: results of a case-control study in southeastern Norway. *J Clin Microbiol* 1992 Dec;30(12):3117-21.
- (73) Butzler JP, Oosterom J. Campylobacter: pathogenicity and significance in foods. *Int J Food Microbiol* 1991 Jan;12(1):1-8.
- (74) Istre GR, Blaser MJ, Shillam P, Hopkins RS. Campylobacter enteritis associated with undercooked barbecued chicken. *Am J Public Health* 1984 Nov;74(11):1265-7.
- (75) Oosterom J, den Uyl CH, Banffer JR, Huisman J. Epidemiological investigations on Campylobacter jejuni in households with a primary infection. *J Hyg (Lond)* 1984 Oct;93(2):325-32.
- (76) Said B, Wright F, Nichols GL, Reacher M, Rutter M. Outbreaks of infectious disease associated with private drinking water supplies in England and Wales 1970-2000. *Epidemiol Infect* 2003 Jun;130(3):469-79.
- (77) Pebody RG, Ryan MJ, Wall PG. Outbreaks of campylobacter infection: rare events for a common pathogen. *Commun Dis Rep CDR Rev* 1997 Mar 7;7(3):R33-R37.
- (78) Alary M, Nadeau D. An outbreak of Campylobacter enteritis associated with a community water supply. *Can J Public Health* 1990 Jul;81(4):268-71.
- (79) Engberg J, Gerner-Smidt P, Scheutz F, Moller NE, On SL, Molbak K. Water-borne Campylobacter jejuni infection in a Danish town---a 6-week continuous source outbreak. *Clin Microbiol Infect* 1998 Jan;4(11):648-56.
- (80) Godoy P, Artigues A, Nuin C, Aramburu J, Perez M, Dominguez A, et al. [Outbreak of gastroenteritis caused by Campylobacter jejuni transmitted through drinking water]. *Med Clin (Barc)* 2002 Nov 23;119(18):695-8.
- (81) Hanninen ML, Haajanen H, Pummi T, Wermundsen K, Katila ML, Sarkkinen H, et al. Detection and typing of Campylobacter jejuni and Campylobacter coli and analysis of indicator organisms in three waterborne outbreaks in Finland. *Appl Environ Microbiol* 2003 Mar;69(3):1391-6.
- (82) Jones IG, Roworth M. An outbreak of Escherichia coli O157 and campylobacteriosis associated with contamination of a drinking water supply. *Public Health* 1996 Sep;110(5):277-82.

- (83) Holme R. Drinking water contamination in Walkerton, Ontario: positive resolutions from a tragic event. *Water Sci Technol* 2003;47(3):1-6.
- (84) Lind L, Sjogren E, Melby K, Kaijser B. DNA fingerprinting and serotyping of *Campylobacter jejuni* isolates from epidemic outbreaks. *J Clin Microbiol* 1996 Apr;34(4):892-6.
- (85) Maurer AM, Sturchler D. A waterborne outbreak of small round structured virus, campylobacter and shigella co-infections in La Neuveville, Switzerland, 1998. *Epidemiol Infect* 2000 Oct;125(2):325-32.
- (86) Melby K, Gondrosen B, Gregusson S, Ribe H, Dahl OP. Waterborne campylobacteriosis in northern Norway. *Int J Food Microbiol* 1991 Feb;12(2-3):151-6.
- (87) Miettinen IT, Zacheus O, von Bonsdorff CH, Vartiainen T. Waterborne epidemics in Finland in 1998-1999. *Water Sci Technol* 2001;43(12):67-71.
- (88) Sacks JJ, Lieb S, Baldy LM, Berta S, Patton CM, White MC, et al. Epidemic campylobacteriosis associated with a community water supply. *Am J Public Health* 1986 Apr;76(4):424-8.
- (89) Miettinen IT, Zacheus O, von Bonsdorff CH, Vartiainen T. Waterborne epidemics in Finland in 1998-1999. *Water Sci Technol* 2001;43(12):67-71.
- (90) Sacks JJ, Lieb S, Baldy LM, Berta S, Patton CM, White MC, et al. Epidemic campylobacteriosis associated with a community water supply. *Am J Public Health* 1986 Apr;76(4):424-8.
- (91) Moore J, Caldwell P, Millar B. Molecular detection of *Campylobacter* spp. in drinking, recreational and environmental water supplies. *Int J Hyg Environ Health* 2001 Nov;204(2-3):185-9.
- (92) Moore JE, Caldwell PS, Millar BC, Murphy PG. Occurrence of *Campylobacter* spp. in water in Northern Ireland: implications for public health. *Ulster Med J* 2001 Nov;70(2):102-7.
- (93) Savill MG, Hudson JA, Ball A, Klena JD, Scholes P, Whyte RJ, et al. Enumeration of *Campylobacter* in New Zealand recreational and drinking waters. *J Appl Microbiol* 2001 Jul;91(1):38-46.
- (94) Hernandez J, Fayos A, Alonso JL, Owen RJ. Ribotypes and AP-PCR fingerprints of thermophilic campylobacters from marine recreational waters. *J Appl Bacteriol* 1996 Feb;80(2):157-64.
- (95) Louis VR, Gillespie IA, O'Brien SJ, Russek-Cohen E, Pearson AD, Colwell RR. Temperature-driven *Campylobacter* seasonality in England and Wales. *Appl Environ Microbiol* 2005 Jan;71(1):85-92.
- (96) Koro ME, Anandan S, Quinlan JJ. Microbial quality of food available to populations of differing socioeconomic status. *Am J Prev Med* 2010 May;38(5):478-81.
- (97) Kovats RS, Edwards SJ, Charron D, Cowden J, D'Souza RM, Ebi KL, et al. Climate variability and campylobacter infection: an international study. *Int J Biometeorol* 2005 Mar;49(4):207-14.
- (98) Paschke C, Apelt N, Fleischmann E, Perona P, Walentiny C, Loscher T, et al. Controlled study on enteropathogens in travellers returning from the tropics with and without diarrhoea. *Clin Microbiol Infect* 2011 Aug;17(8):1194-200.
- (99) Ekdahl K, Giesecke J. Travellers returning to Sweden as sentinels for comparative disease incidence in other European countries, campylobacter and giardia infection as examples. *Euro Surveill* 2004 Sep;9(9):6-9.
- (100) Beecham HJ, III, Lebron CI, Echeverria P. Short report: impact of traveler's diarrhea on United States troops deployed to Thailand. *Am J Trop Med Hyg* 1997 Dec;57(6):699-701.
- (101) Mattila L, Siitonen A, Kyronseppa H, Simula I, Oksanen P, Stenvik M, et al. Seasonal variation in etiology of travelers' diarrhea. Finnish-Moroccan Study Group. *J Infect Dis* 1992 Feb;165(2):385-8.
- (102) Pearson AD, Healing TD. The surveillance and control of campylobacter infection. *Commun Dis Rep CDR Rev* 1992 Nov 6;2(12):R133-R139.
- (103) Haberberger RL, Jr., Mikhail IA, Burans JP, Hyams KC, Glenn JC, Diniega BM, et al. Travelers' diarrhea among United States military personnel during joint American-Egyptian armed forces exercises in Cairo, Egypt. *Mil Med* 1991 Jan;156(1):27-30.
- (104) Black RE. Epidemiology of travelers' diarrhea and relative importance of various pathogens. *Rev Infect Dis* 1990 Jan;12 Suppl 1:S73-S79.

- (105) Black RE. Pathogens that cause travelers' diarrhea in Latin America and Africa. *Rev Infect Dis* 1986 May;8 Suppl 2:S131-S135.
- (106) Brasseur D, Casimir G, Goyens P. *Campylobacter jejuni* and infantile traveller's diarrhoea. *Eur J Pediatr* 1986 Feb;144(5):517-8.
- (107) Echeverria P, Blacklow NR, Sanford LB, Cukor GG. Travelers' diarrhea among American Peace Corps volunteers in rural Thailand. *J Infect Dis* 1981 Jun;143(6):767-71.
- (108) Kapperud G, Lassen J, Ostroff SM, Aasen S. Clinical features of sporadic *Campylobacter* infections in Norway. *Scand J Infect Dis* 1992;24(6):741-9.
- (109) Ekdahl K, Andersson Y. Regional risks and seasonality in travel-associated campylobacteriosis. *BMC Infect Dis* 2004 Nov 29;4(1):54.
